# Supplementary material for: Mental Health Self-Directed Care Financing: Efficacy in Improving Outcomes and Controlling Costs for Adults With Serious Mental Illness
Source: Atypon-hosted journal article supplement (doi:10.1176/appi.ps.201800337), 2019-01-11
Supplement: appi.ps.201800337.ds001.pdf [file appi.ps.201800337.ds001.pdf]

 


Psychiatry Online
